# Supplementary material for: Dopamine Modulates the Processing of Food Odour in the Ventral Striatum
Source: MDPI journal article supplement (doi:10.3390/biomedicines10051126), 2022-05-12
Supplement: s1 [file s1]

Supplementary Materials:

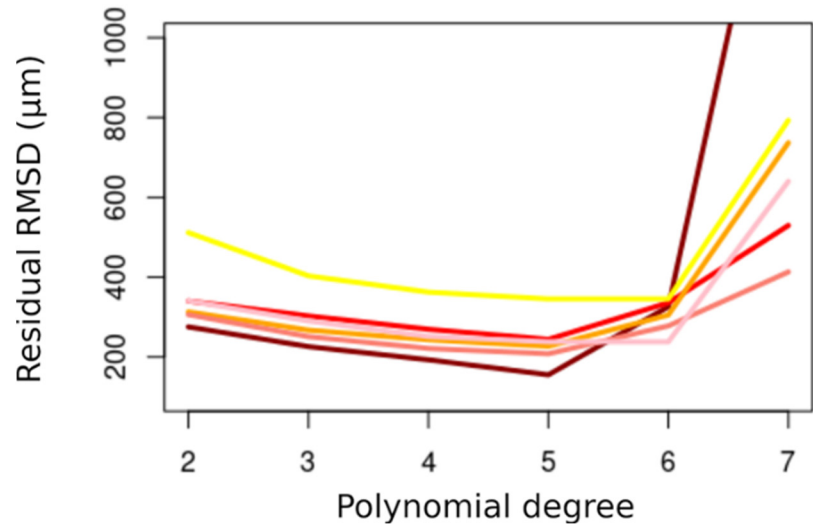

**Figure S1.** Residual root-mean square distance (RMSD) between anatomical landmark structures was computed after polynomial warping with polynomial degrees ranging from 2 to 7. A degree of 5 was chosen for spatial normalisation as it minimized the RMSD for all of the six coronal planes (curves are displayed in *dark-red*, *red*, *orange*, *salmon*, *pink* and *yellow* for reference coronal planes 1 to 6, respectively).
